# Supplementary material
Source: PubMed Central journal article supplement (PMC5051634)

**Supplemental Materials**

**Grasping Others' Movements: Rapid Discrimination of Object Size From  
Observed Hand Movements**

by C. Ansuini et al., 2016, *JEP: Human Perception and Performance*

<http://dx.doi.org/10.1037/xhp0000169>

Table S1

Results of comparisons between small and large object for movements recorded in the "action execution" phase and for movements selected for the "action observation" phase. Paired samples t-tests were performed for the movement duration. For all other variables the significance of differences between "object size" (2 levels; small vs. large) and "time" (10 levels; from 10 to 100% in 10 steps) was analyzed using a within subject analysis of variance (ANOVA)

| <i>Kinematic variable</i> | <i>Recorded movements<br/>(Action execution phase)</i>                                                                                                                                                                                                                   | <i>Selected movements<br/>(Action observation phase)</i>                                                                                                                                                                                                                 |
|---------------------------|--------------------------------------------------------------------------------------------------------------------------------------------------------------------------------------------------------------------------------------------------------------------------|--------------------------------------------------------------------------------------------------------------------------------------------------------------------------------------------------------------------------------------------------------------------------|
| Movement duration         | Mean ( $\pm$ SE) small = 780 $\pm$ 22 ms<br>Mean ( $\pm$ SE) large = 745 $\pm$ 27 ms<br>t(14) = 3.767; p = .002                                                                                                                                                          | Mean ( $\pm$ SE) small = 768 $\pm$ 16 ms<br>Mean ( $\pm$ SE) large = 750 $\pm$ 20 ms<br>t(29) = 1.464; p = .154                                                                                                                                                          |
| Wrist velocity            | Mean ( $\pm$ SE) small = 521 $\pm$ 13 mm/s<br>Mean ( $\pm$ SE) large = 555 $\pm$ 17 mm/s<br>Size = [F <sub>(1,14)</sub> = 24.538; p = .000]<br>Time = [F <sub>(9,126)</sub> = 246.750; p = .000]<br>Size $\times$ Time = [F <sub>(9,126)</sub> = 17.677; p = .000]       | Mean ( $\pm$ SE) small = 524 $\pm$ 10 mm/s<br>Mean ( $\pm$ SE) large = 548 $\pm$ 13 mm/s<br>Size = [F <sub>(1,29)</sub> = 9.396; p = .005]<br>Time = [F <sub>(9,261)</sub> = 439.634; p = .000]<br>Size $\times$ Time = [F <sub>(9,261)</sub> = 23.676; p = .000]        |
| Grip aperture             | Mean ( $\pm$ SE) small = 42.17 $\pm$ 1.22 mm<br>Mean ( $\pm$ SE) large = 73.82 $\pm$ 2.20 mm<br>Size = [F <sub>(1,14)</sub> = 406.867; p = .000]<br>Time = [F <sub>(9,126)</sub> = 239.327; p = .000]<br>Size $\times$ Time = [F <sub>(9,126)</sub> = 257.009; p = .000] | Mean ( $\pm$ SE) small = 42.38 $\pm$ 1.02 mm<br>Mean ( $\pm$ SE) large = 75.79 $\pm$ 1.57 mm<br>Size = [F <sub>(1,29)</sub> = 488.113; p = .000]<br>Time = [F <sub>(9,261)</sub> = 420.685; p = .000]<br>Size $\times$ Time = [F <sub>(9,261)</sub> = 248.699; p = .000] |
| Wrist height              | Mean ( $\pm$ SE) small = 68.76 $\pm$ 3.53 mm<br>Mean ( $\pm$ SE) large = 85.08 $\pm$ 3.53 mm<br>Size = [F <sub>(1,14)</sub> = 345.491; p = .000]<br>Time = [F <sub>(9,126)</sub> = 132.876; p = .000]<br>Size $\times$ Time = [F <sub>(9,126)</sub> = 143.868; p = .000] | Mean ( $\pm$ SE) small = 68.67 $\pm$ 2.40 mm<br>Mean ( $\pm$ SE) large = 85.19 $\pm$ 2.60 mm<br>Size = [F <sub>(1,29)</sub> = 327.735; p = .000]<br>Time = [F <sub>(9,261)</sub> = 439.634; p = .000]<br>Size $\times$ Time = [F <sub>(9,261)</sub> = 107.658; p = .000] |
| X-thumb                   | Mean ( $\pm$ SE) small = -2.19 $\pm$ 1.78<br>Mean ( $\pm$ SE) large = -15.17 $\pm$ 1.60<br>Size = [F <sub>(1,14)</sub> = 90.569; p = .000]<br>Time = [F <sub>(9,126)</sub> = 22.245; p = .000]<br>Size $\times$ Time = [F <sub>(9,126)</sub> = 77.525; p = .000]         | Mean ( $\pm$ SE) small = -1.91 $\pm$ 1.22<br>Mean ( $\pm$ SE) large = -15.12 $\pm$ 1.08<br>Size = [F <sub>(1,29)</sub> = 238.345; p = .000]<br>Time = [F <sub>(9,261)</sub> = 29.294; p = .000]<br>Size $\times$ Time = [F <sub>(9,261)</sub> = 87.980; p = .000]        |
| Y-thumb                   | Mean ( $\pm$ SE) small = 14.85 $\pm$ 1.71<br>Mean ( $\pm$ SE) large = 6.21 $\pm$ 1.94<br>Size = [F <sub>(1,14)</sub> = 130.878; p = .000]<br>Time = [F <sub>(9,126)</sub> = 52.857; p = .000]<br>Size $\times$ Time = [F <sub>(9,126)</sub> = 135.612; p = .000]         | Mean ( $\pm$ SE) small = 15.14 $\pm$ 1.14<br>Mean ( $\pm$ SE) large = 5.74 $\pm$ 1.42<br>Size = [F <sub>(1,29)</sub> = 191.383; p = .000]<br>Time = [F <sub>(9,261)</sub> = 84.022; p = .000]<br>Size $\times$ Time = [F <sub>(9,261)</sub> = 159.989; p = .000]         |

|                |                                                                                                                                                                                                                                                 |                                                                                                                                                                                                                                                 |
|----------------|-------------------------------------------------------------------------------------------------------------------------------------------------------------------------------------------------------------------------------------------------|-------------------------------------------------------------------------------------------------------------------------------------------------------------------------------------------------------------------------------------------------|
| Z-thumb        | Mean ( $\pm$ SE) small = $-79.22 \pm 1.50$<br>Mean ( $\pm$ SE) large = $-82.40 \pm 1.44$<br>Size = $[F_{(1,14)} = 22.363; p = .000]$<br>Time = $[F_{(9,126)} = 11.391; p = .000]$<br>Size $\times$ Time = $[F_{(9,126)} = 37.032; p = .000]$    | Mean ( $\pm$ SE) small = $-79.06 \pm 1.08$<br>Mean ( $\pm$ SE) large = $-82.95 \pm 0.98$<br>Size = $[F_{(1,29)} = 49.898; p = .000]$<br>Time = $[F_{(9,261)} = 22.989; p = .000]$<br>Size $\times$ Time = $[F_{(9,261)} = 62.534; p = .000]$    |
| X-index        | Mean ( $\pm$ SE) small = $3.87 \pm 2.17$<br>Mean ( $\pm$ SE) large = $-5.99 \pm 2.32$<br>Size = $[F_{(1,14)} = 136.174; p = .000]$<br>Time = $[F_{(9,126)} = 56.205; p = .000]$<br>Size $\times$ Time = $[F_{(9,126)} = 76.311; p = .000]$      | Mean ( $\pm$ SE) small = $4.10 \pm 1.41$<br>Mean ( $\pm$ SE) large = $-6.00 \pm 1.74$<br>Size = $[F_{(1,29)} = 174.493; p = .000]$<br>Time = $[F_{(9,261)} = 83.713; p = .000]$<br>Size $\times$ Time = $[F_{(9,261)} = 84.148; p = .000]$      |
| Y-index        | Mean ( $\pm$ SE) small = $54.76 \pm 2.09$<br>Mean ( $\pm$ SE) large = $69.32 \pm 1.92$<br>Size = $[F_{(1,14)} = 231.573; p = .000]$<br>Time = $[F_{(9,126)} = 94.803; p = .000]$<br>Size $\times$ Time = $[F_{(9,126)} = 75.557; p = .000]$     | Mean ( $\pm$ SE) small = $55.34 \pm 1.57$<br>Mean ( $\pm$ SE) large = $70.04 \pm 1.35$<br>Size = $[F_{(1,29)} = 283.058; p = .000]$<br>Time = $[F_{(9,261)} = 167.616; p = .000]$<br>Size $\times$ Time = $[F_{(9,261)} = 63.325; p = .000]$    |
| Z-index        | Mean ( $\pm$ SE) small = $-73.32 \pm 2.28$<br>Mean ( $\pm$ SE) large = $-51.48 \pm 3.21$<br>Size = $[F_{(1,14)} = 183.383; p = .000]$<br>Time = $[F_{(9,126)} = 196.741; p = .000]$<br>Size $\times$ Time = $[F_{(9,126)} = 172.909; p = .000]$ | Mean ( $\pm$ SE) small = $-72.98 \pm 1.58$<br>Mean ( $\pm$ SE) large = $-50.22 \pm 2.42$<br>Size = $[F_{(1,29)} = 247.804; p = .000]$<br>Time = $[F_{(9,261)} = 357.337; p = .000]$<br>Size $\times$ Time = $[F_{(9,261)} = 174.547; p = .000]$ |
| X-finger plane | Mean ( $\pm$ SE) small = $-0.96 \pm 0.007$<br>Mean ( $\pm$ SE) large = $-0.95 \pm 0.006$<br>Size = $[F_{(1,14)} = 10.894; p = .005]$<br>Time = $[F_{(9,126)} = 4.983; p = .000]$<br>Size $\times$ Time = $[F_{(9,126)} = 13.429; p = .000]$     | Mean ( $\pm$ SE) small = $-0.97 \pm 0.005$<br>Mean ( $\pm$ SE) large = $-0.95 \pm 0.004$<br>Size = $[F_{(1,29)} = 22.677; p = .000]$<br>Time = $[F_{(9,261)} = 10.284; p = .000]$<br>Size $\times$ Time = $[F_{(9,261)} = 7.954; p = .000]$     |
| Y-finger plane | Mean ( $\pm$ SE) small = $0.15 \pm 0.38$<br>Mean ( $\pm$ SE) large = $0.07 \pm 0.37$<br>Size = $[F_{(1,14)} = 9.775; p = .007]$<br>Time = $[F_{(9,126)} = 69.951; p = .000]$<br>Size $\times$ Time = $[F_{(9,126)} = 10.698; p = .000]$         | Mean ( $\pm$ SE) small = $0.15 \pm 0.03$<br>Mean ( $\pm$ SE) large = $0.07 \pm 0.03$<br>Size = $[F_{(1,29)} = 15.502; p = .000]$<br>Time = $[F_{(9,261)} = 126.713; p = .000]$<br>Size $\times$ Time = $[F_{(9,261)} = 9.894; p = .000]$        |
| Z-finger plane | Mean ( $\pm$ SE) small = $0.05 \pm 0.02$<br>Mean ( $\pm$ SE) large = $0.19 \pm 0.02$<br>Size = $[F_{(1,14)} = 67.300; p = .000]$<br>Time = $[F_{(9,126)} = 5.981; p = .000]$<br>Size $\times$ Time = $[F_{(9,126)} = 71.042; p = .000]$         | Mean ( $\pm$ SE) small = $0.05 \pm 0.02$<br>Mean ( $\pm$ SE) large = $0.19 \pm 0.02$<br>Size = $[F_{(1,29)} = 98.603; p = .000]$<br>Time = $[F_{(9,261)} = 7.115; p = .000]$<br>Size $\times$ Time = $[F_{(9,261)} = 72.283; p = .000]$         |

Figure S1. Results for  $d'$  (A) and RTs (B) in the frontal and the lateral viewpoints as a function of occlusion time point (from 10% up to 80% of reach-to-grasp movement). Bars represent standard error of the means.

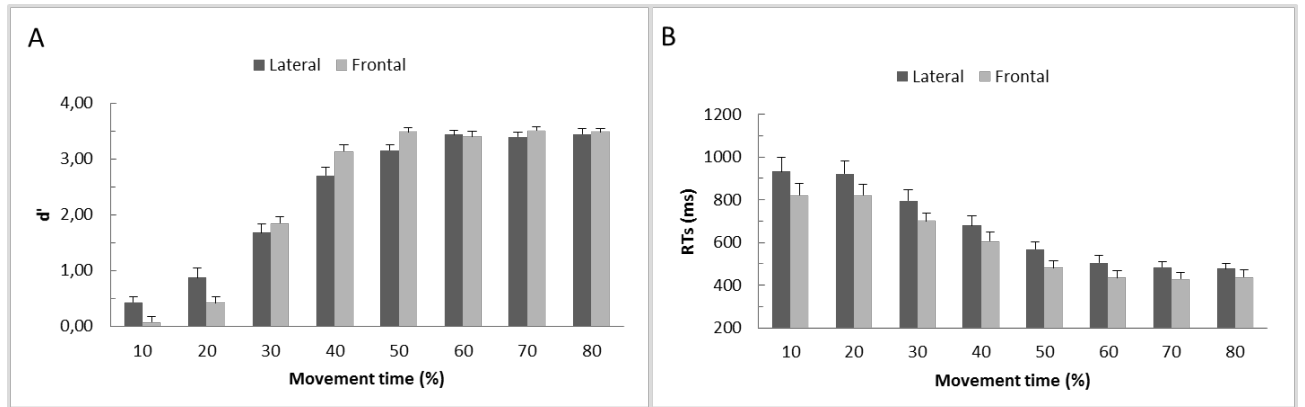

Supplement: NIHMS69211-supplement-Suppl__materials.pdf [file NIHMS69211-supplement-Suppl__materials.pdf]
